# Supplementary material
Source: PubMed Central journal article supplement (PMC4725528)
Supplement: pnas.1524523113.sd03.pdf [file pnas.1524523113.sd03.pdf]

**Table S3. Proteomics Analysis of Lipid Raft Proteins in Endothelial Cells with Flow Treatment.**

A.

| Classification          | OS up | OS down | PS up | PS down | Opposite |
|-------------------------|-------|---------|-------|---------|----------|
| Binding                 | 29    | 17      | 27    | 22      | 0        |
| Catalytic               | 28    | 13      | 27    | 16      | 0        |
| Enzyme Regulator        | 5     | 4       | 4     | 7       | 3        |
| Ion Channel             | 2     | 2       | 0     | 2       | 0        |
| Motor                   | 1     | 0       | 1     | 0       | 0        |
| Receptor                | 13    | 7       | 4     | 9       | 1        |
| Structural Molecular    | 11    | 1       | 10    | 3       | 0        |
| Transcription Regulator | 2     | 0       | 1     | 0       | 0        |
| Translocation Regulator | 3     | 0       | 3     | 0       | 0        |
| Transporter             | 8     | 7       | 3     | 7       | 0        |

B.

| Function | GI number | Protein name        | Fold  |       | P <sub>peptides</sub> |
|----------|-----------|---------------------|-------|-------|-----------------------|
|          |           |                     | OS    | PS    |                       |
| Receptor | Gi 31438  | Integrin $\alpha$ 5 | 1.828 | 0.609 | 0.05                  |

HUVECs were treated with OS ( $0.5 \pm 4$  dyn/cm<sup>2</sup>) or PS ( $12 \pm 4$  dyn/cm<sup>2</sup>) for 2 hr, and purified lipid raft proteins were analyzed by iTRAQ-LC-MS/MS. Proteins with significant change were sorted into functional groups by use of Panther (<http://www.pantherdb.org>). Up, upregulated; down, downregulated; opposite, regulated in opposite fashion.
